# Supplementary material for: Transcriptomic analysis of Anopheles gambiae from Benin reveals overexpression of salivary and cuticular proteins associated with cross-resistance to pyrethroids and organophosphates
Source: Springer Nature journal article supplement (doi:10.1186/s12864-024-10261-x), 2024-04-06
Supplement: MOESM3 [file 12864_2024_10261_MOESM3_ESM.pdf]

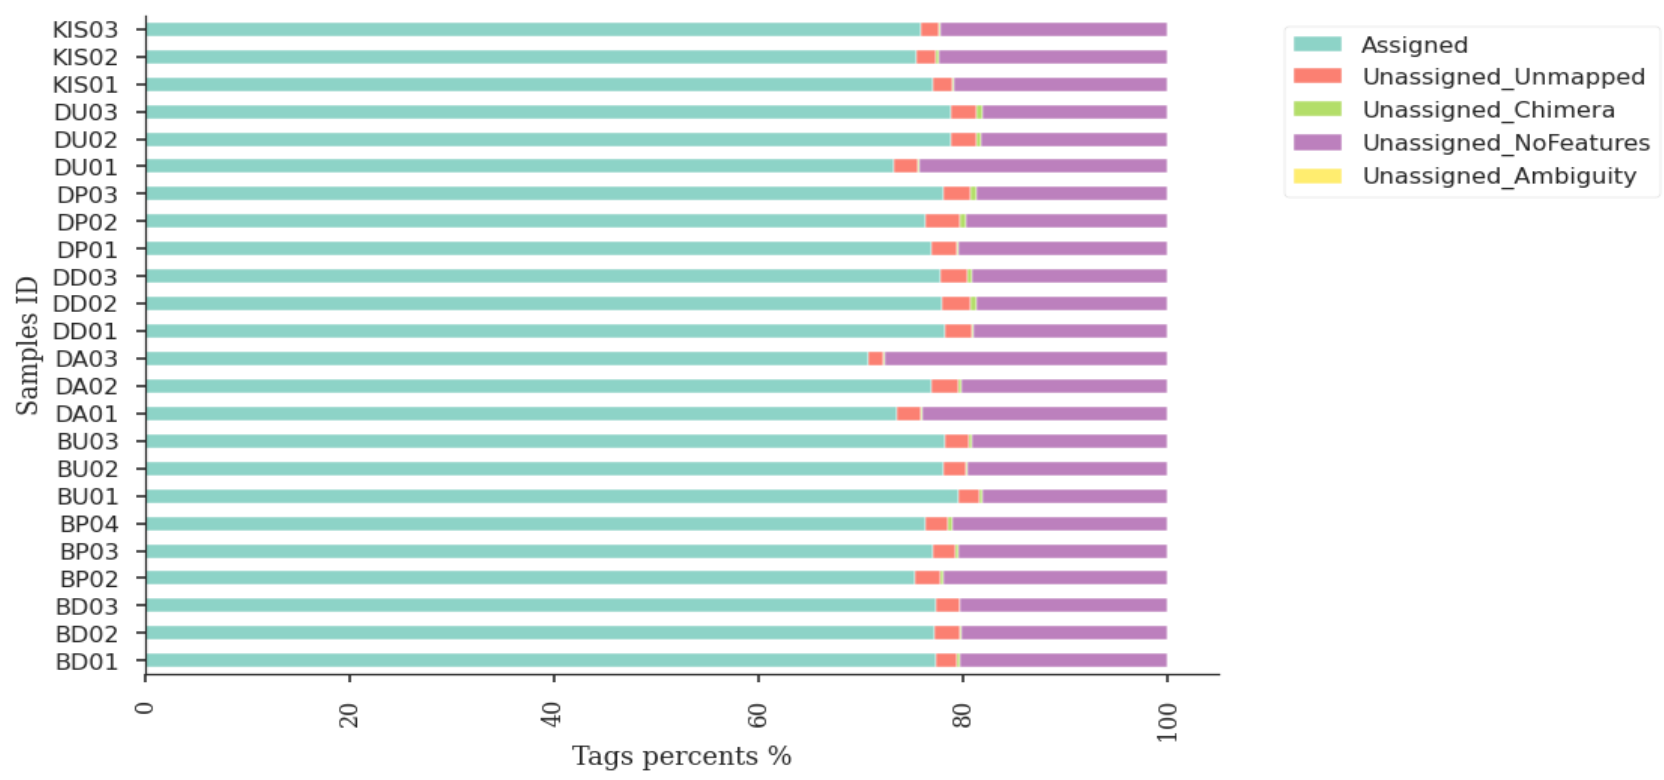

**Additional file 3:** Summary statistics of the read quantification
