# Supplementary material for: Transcriptomic analysis of Anopheles gambiae from Benin reveals overexpression of salivary and cuticular proteins associated with cross-resistance to pyrethroids and organophosphates
Source: Springer Nature journal article supplement (doi:10.1186/s12864-024-10261-x), 2024-04-06
Supplement: MOESM4 [file 12864_2024_10261_MOESM4_ESM.pdf]

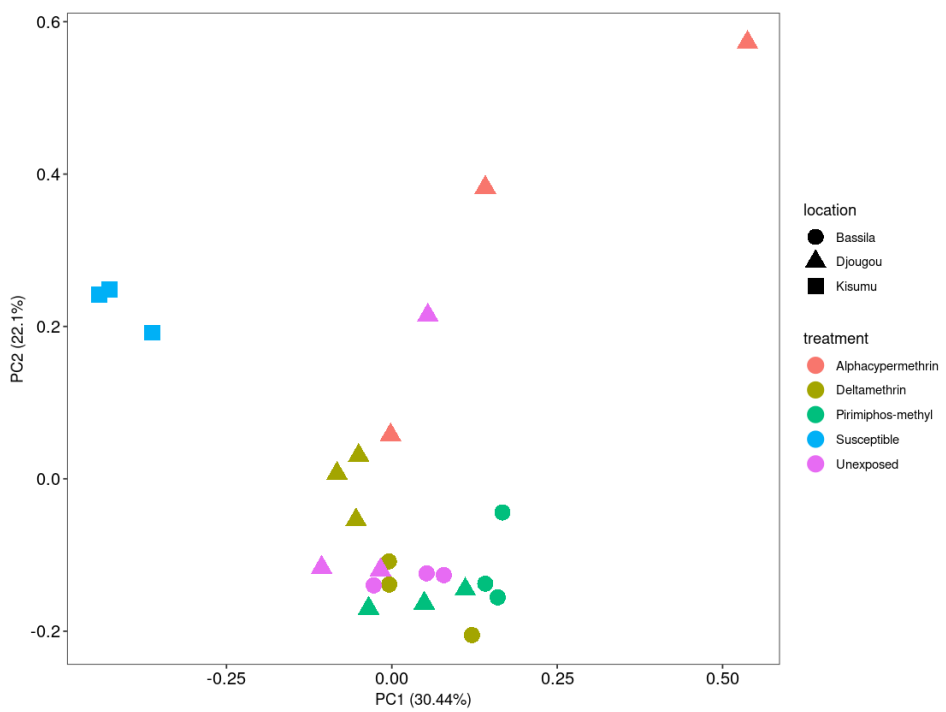

**Additional file 4:** PCA plot presenting an overview of the mosquitoes per location and treatment  
 The plot demonstrates a distinct separation between the susceptible strain Kisumu and the mosquitoes from Bassila and Djougou when exposed to the different insecticides alphacypermethrin, deltamethrin and pirimiphosmethyl.
