# Supplementary material for: Transcriptomic analysis of Anopheles gambiae from Benin reveals overexpression of salivary and cuticular proteins associated with cross-resistance to pyrethroids and organophosphates
Source: Springer Nature journal article supplement (doi:10.1186/s12864-024-10261-x), 2024-04-06
Supplement: MOESM13 [file 12864_2024_10261_MOESM13_ESM.pdf]

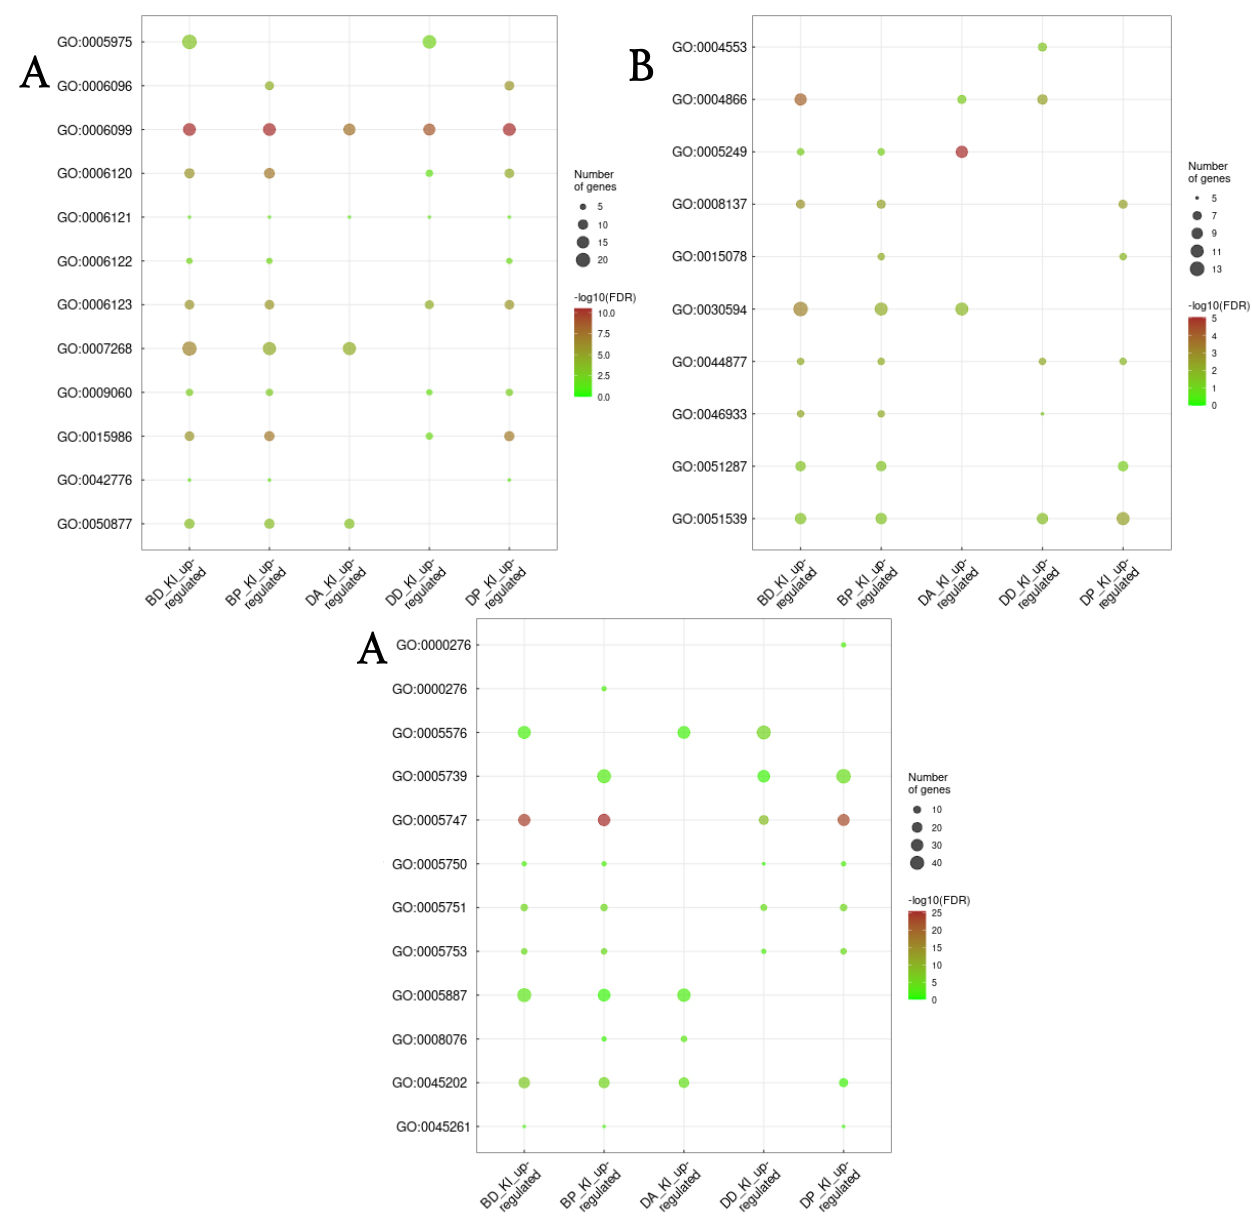

**Additional file 13: Gene ontology enrichments** Panel A shows enriched terms within biological process; B, the enriched terms in molecular functions and C, the cellular components.
