# Supplementary material for: Transcriptomic analysis of Anopheles gambiae from Benin reveals overexpression of salivary and cuticular proteins associated with cross-resistance to pyrethroids and organophosphates
Source: Springer Nature journal article supplement (doi:10.1186/s12864-024-10261-x), 2024-04-06
Supplement: MOESM14 [file 12864_2024_10261_MOESM14_ESM.pdf]

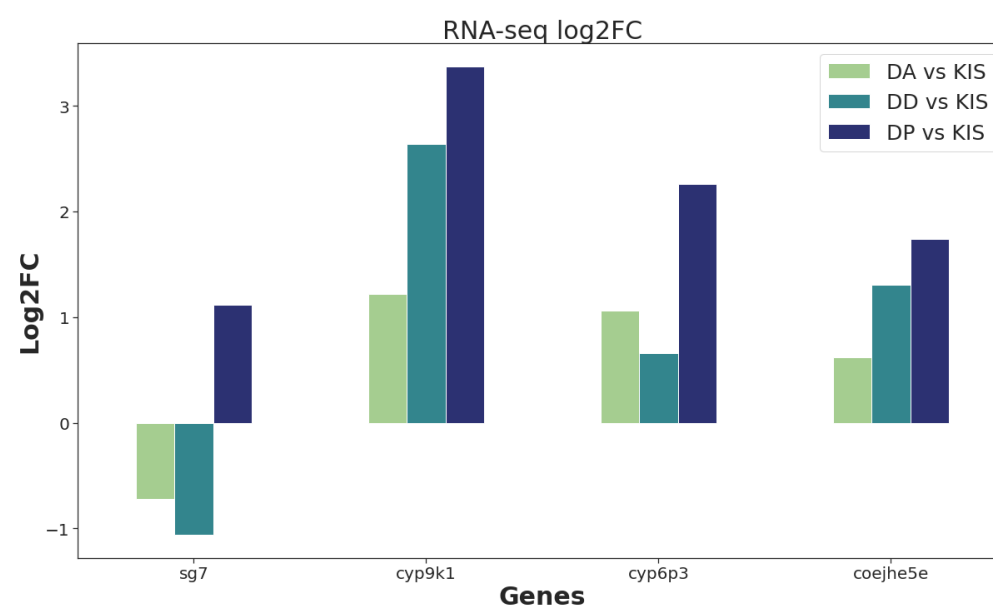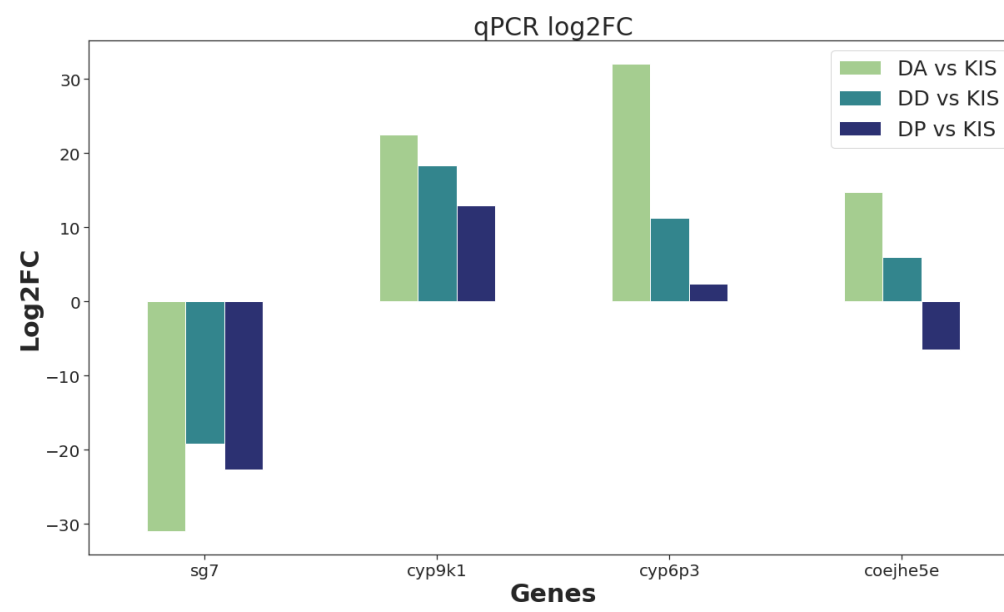

**Additional file 14:** Comparison of expression levels of DEGs measured by qRT-PCR and RNA-Seq Comparisons between mosquitoes exposed to alphacypermethrin (DA), deltamethrin(DD) and pirimiphos-methyl(DP) against Kisumu (KIS)
